# Supplementary material for: Genome Sequence of the Saprophyte Leptospira biflexa Provides Insights into the Evolution of Leptospira and the Pathogenesis of Leptospirosis
Source: PLOS journal article supplement (doi:10.1371/journal.pone.0001607), 2008-02-13
Supplement: S1 (10.1371/journal.pone.0001607.s001) [file journal.pone.0001607.s001]

**Figure S1**
